# Supplementary material for: Tumor immune-gene expression profiles and peripheral immune phenotypes associated with clinical outcomes of locally advanced pancreatic cancer following FOLFIRINOX
Source: PubMed Central journal article supplement — ESMO Open. 2022 May 13;7(3):100484. doi: 10.1016/j.esmoop.2022.100484 (PMC9271485; doi:10.1016/j.esmoop.2022.100484), 2022-05-13
Supplement: mmc1.pdf [file mmc1.pdf]

**Supplementary methods 1.** For peripheral immune cell analysis, 15 mL blood was collected at baseline and at the time of each disease evaluation during treatment, and PBMCs were purified by standard density gradient centrifugation. Multicolor flow cytometry was performed using the CytoFLEX flow cytometry platform (Beckman Coulter, Brea, CA) to determine the peripheral immune cell proportions levels. The panel for multicolor flow cytometry to evaluate peripheral immune cell proportions (immune cell panel) included CD3 (UCHT1; BioLegend, San Diego, CA), CD4 (OKT4; BioLegend), CD8 (SK1; BioLegend), CD14 (63D3; BioLegend), CD11c (3.9; BioLegend), CD56 (5.1H11; BioLegend),  $\gamma\delta$ -TCR (B1; BioLegend), HLA-DR (L243; BioLegend), CD69 (FN50; BioLegend), and FoxP3 (236A-E7; eBioscience, San Diego, CA). The proportion of each immune cell population, including CD4<sup>+</sup> T cells, CD4<sup>+</sup>Foxp3<sup>+</sup> regulatory T cells, CD8<sup>+</sup> T cells, CD56<sup>+</sup> NK cells,  $\gamma\delta$  T cells, HLA-DR<sup>+</sup> myeloid cells, CD14<sup>+</sup> CD11c<sup>+</sup>HLA-DR<sup>+</sup> monocytes, and CD14<sup>-</sup> CD11c<sup>+</sup>HLA-DR<sup>+</sup> dendritic cells was estimated based on the total number of live cells. The proportions of activated CD4<sup>+</sup> T cells, CD8<sup>+</sup> T cells, CD56<sup>+</sup> NK cells, and  $\gamma\delta$  T cells were measured by gating on CD69<sup>+</sup> cells. The proportions of CD4<sup>+</sup> and CD8<sup>+</sup> T cells with checkpoint expression were measured using a multicolor flow cytometry panel (T cell checkpoint panel) that included PD-1 (EH12.2H7; BioLegend), LAG-3 (11C3C65; BioLegend), CTLA-4 (L3D10; BioLegend), and TIGIT (A15153G; BioLegend).

**Supplementary methods 2.** Total RNA was extracted and purified from formalin-fixed paraffin embedded (FFPE) tissue from each patient who underwent surgical resection. The Denovix DS 11 AATI Fragment Analyzer was used to evaluate the quantity and quality of each isolated RNA sample before analysis. Approximately 500–1000 ng total RNA was used for gene expression analysis, and the input amount of total RNA was

s increased for samples with excess fragmentation of the RNA strands. The samples were thawed right before the analysis and mixed with the reporter code set and probe set in hybridization buffer. The samples were hybridized to the probes at 65°C for 16–24 hours. Using the Nanostring nCounter prep station, inadequately hybridized probes were removed, and properly hybridized transcript-probe complexes were immobilized onto Nanostring cartridges. Finally, the fixed samples on the cartridges were scanned and read using the Nanostring nCounter Digital Analyzer (NCT-DIGT-120) and were recorded as reporter code count (RCC) files. RCC files were analyzed using nSolver software (Nanostring Technologies) for data QC, including imaging QC, binding density QC, and positive and negative control QC. The expression levels of each gene in samples with adequate data QC results were normalized to the expression of positive control and housekeeping genes using nSolver. Differential gene expression analyses were performed using ROSALIND (<https://rosalind.onramp.bio/>), with a HyperScale architecture developed by OnRamp BioInformatics (San Diego, CA). Fold changes and p-values were calculated using criteria provided by Nanostring Technologies. The nominal p-values were adjusted for the false discovery rate, and genes with a differential expression of absolute  $\log_2$  fold change ( $\log_2FC$ )  $> 1.0$  with an adjusted p-value  $< 0.15$  were considered significant.

**Supplementary methods 3.** From the differential expression analysis, t-statistics of each gene against each covariate in the model is calculated. The directed global significance scores of each gene set were calculated as the square root of the mean squared signed t-statistics of each genes, which represent the relative over- or under-expression of the genes relative to a set of genes annotated as belonging to the specific immunologic pathway.

$$U = \left( \frac{1}{p} \sum_{i=1}^p \text{sign}(t_i \cdot t_i^2) \right)$$

$$\text{Directed global significance score} = \text{sign}(U) |U|^{\frac{1}{2}},$$

*sign(U) equals 1 if  $U > 0$  and  $-1$  if  $U < 0$*

**Supplementary methods 4.** Four markers (CD8, CD68, CD163, and myeloperoxidase [MPO]) were selected for evaluation of cytotoxic T cells, macrophages, M2-like macrophages, and neutrophils, respectively. Formalin-fixed paraffin-embedded (FFPE) tissue sections (4  $\mu\text{m}$  thick) were stained with an automatic immunohistochemical staining device (Benchmark XT; Ventana Medical Systems, Tucson, AZ) for pan-cytokeratin (1:400, mouse monoclonal, clone AE1/AE3, catalog no. NCL-L-AE1/AE3; Novocastra, CA), CD8 (1:400, clone POLY, catalog no. 108M-96; Cell Marque, Rocklin, CA), CD163 (1:400, clone 10D6, catalog no. NCL-CD163; Novo, Newcastle, UK), CD68 (1:2000, clone KP1, catalog no. M0814; DAKO, Glostrup, Denmark), MPO (1:2000, clone POLY, catalog no. A0398; DAKO) and MARCO (1:75, Rabbit polyclonal, clone POLY, catalog No.AB231046, Abcam, Cambridge, UK).

Supplementary figure 1. Detailed method of the tumor microenvironment immune cell analysis. “Invasive tumor margin/desmoplastic” area annotation, “Peritumoral” area annotation (25  $\mu\text{m}$  from cytokeratin-positive cells), and “Immune cell counting” were merged to count stained immune cells in the two regions (peritumoral and stromal). The cell counts per  $\text{mm}^2$  of each region were then obtained and compared between the two recurrence groups (DFS10 Achieved vs. DFS10 Failed).

Supplementary figure 2. Representative flow cytometry plots. A. Foxp3<sup>+</sup>CD4<sup>+</sup> regulatory T cell. B. CD14<sup>+</sup>CD11c<sup>+</sup>HLA-DR<sup>+</sup> monocyte. C. TIGIT<sup>+</sup>CD4<sup>+</sup> T cell. D. PD-1<sup>+</sup>CD8<sup>+</sup> T cell.

Supplementary figure 3. Non-significant changes in the peripheral immune phenotype from baseline to completion of eight cycles of mFOLFIRINOX using the immune cell panel and the T cell checkpoint panel.

Supplementary figure 4. CD68<sup>+</sup> cells, CD163<sup>+</sup> cells, MPO<sup>+</sup> and MARCO<sup>+</sup> cells in the tumor microenvironment according to the recurrence group (DFS10 achieved vs. failed).

Supplementary figure 5. Comparison of immune cell scores between the two recurrence groups (DFS10 achieved vs. failed) estimated from the immune-related gene expression profile using the Nanostring annotation.

Table S1. Baseline clinical characteristics of patients treated with neoadjuvant mFOLFIRINOX.

Table S2. Availability of biomarker samples of patients treated in the phase 2 clinical trial (NCT02749136).

Table S3. Univariate analysis of survival outcomes according to baseline peripheral immune cell level (Cox proportional hazards model, continuous variable)

Table S4. Non-parametric bootstrapping of paired comparison of immune cell level pre- and post-chemotherapy.

Table S5. Comparison of clinical variables between the two recurrence groups

Table S6. Gene list of significant differential expression between the recurrence groups.

Table S7. Directed enrichment score of gene sets from nanostring data

Table S8. Clinical characteristics of pancreatic cancer patients from the TCGA data (the Human Protein Atlas).

Supplementary figure 1.

# Peritumoral area

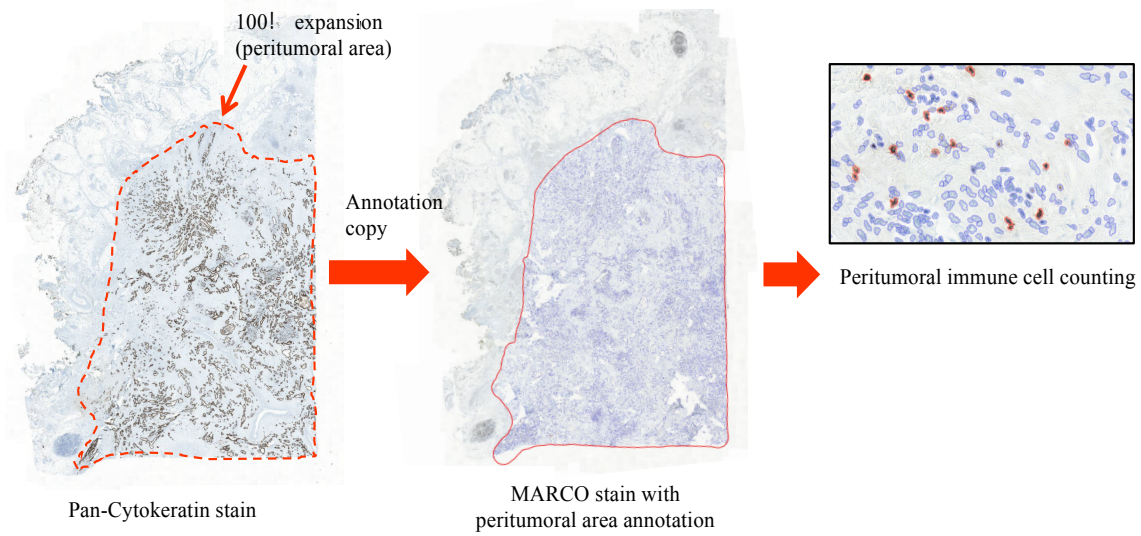

# Total area

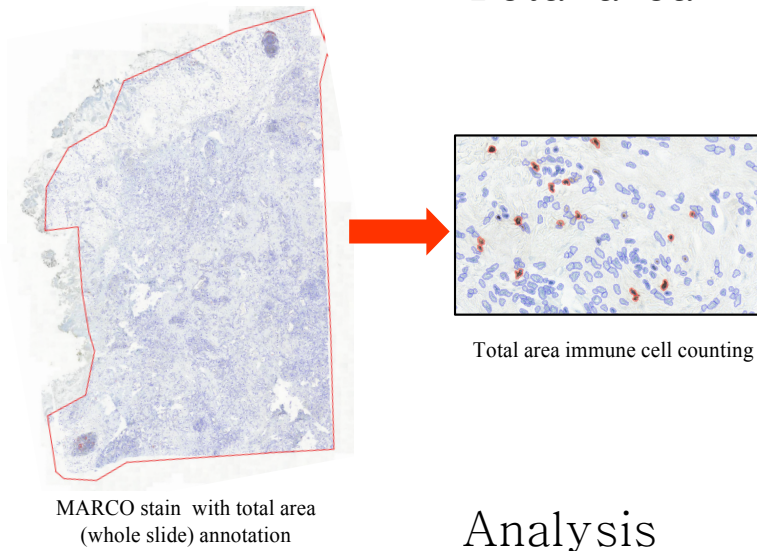

# Analysis

Repeated measures for CD8, CD68, and CD163

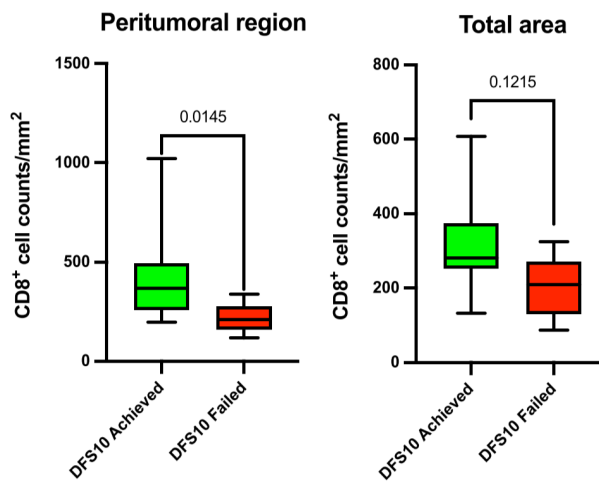

Supplementary figure 2.

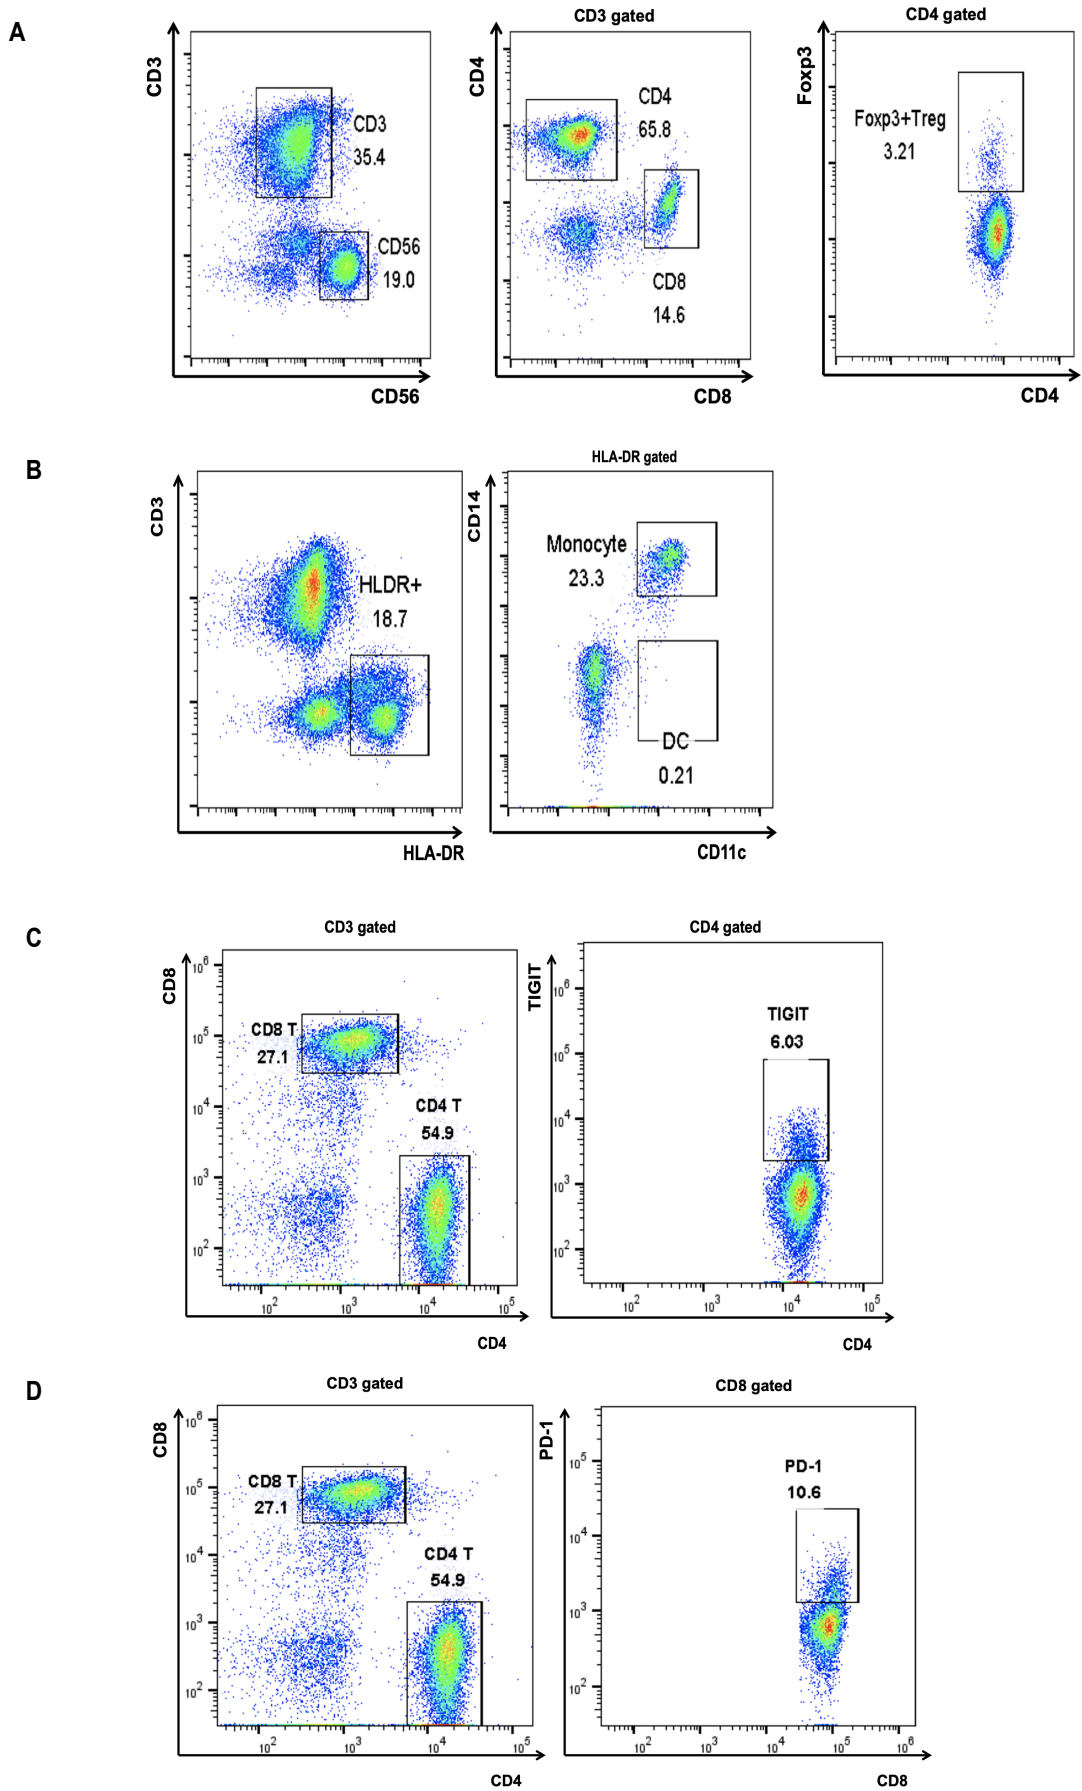

### Supplementary figure 3.

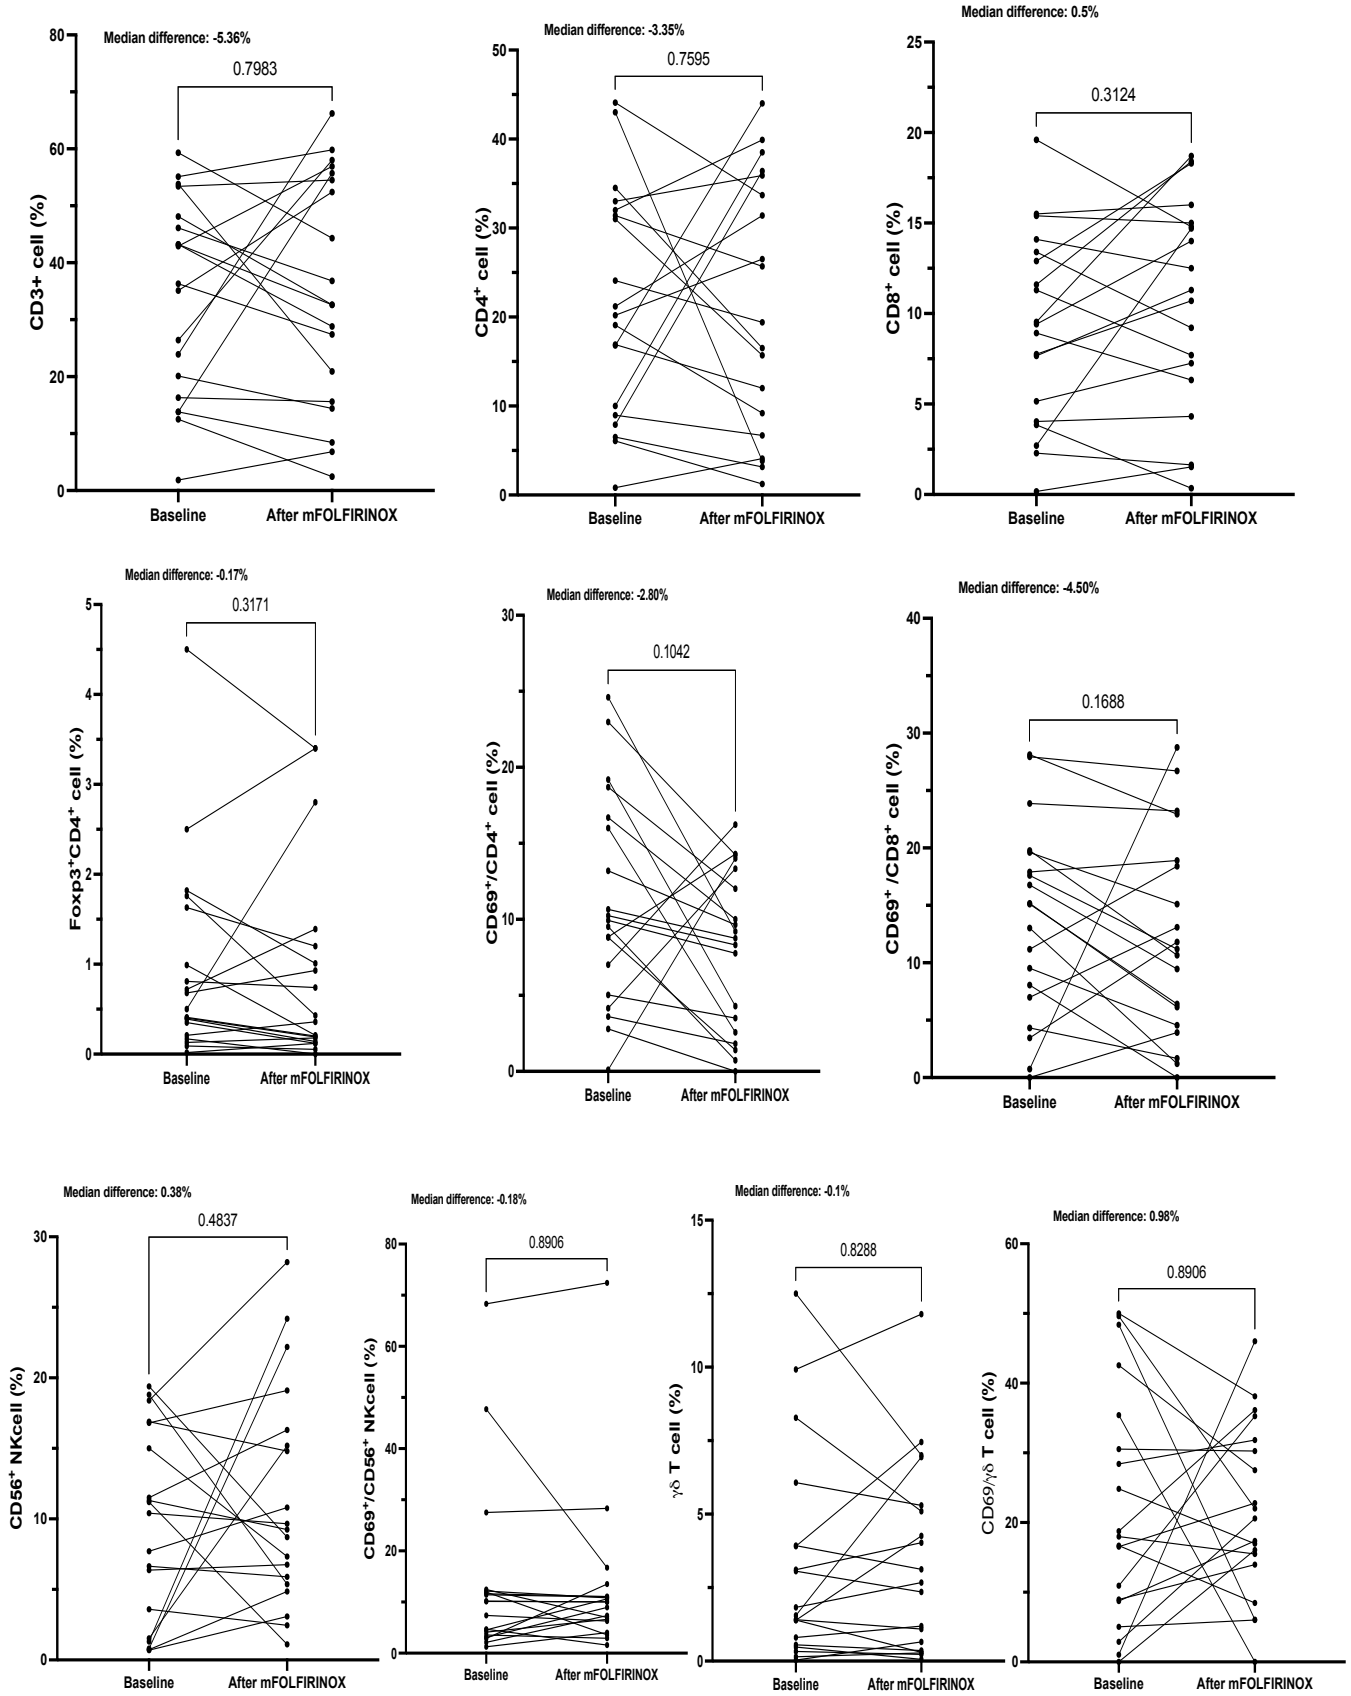

Supplementary figure 3. (continued)

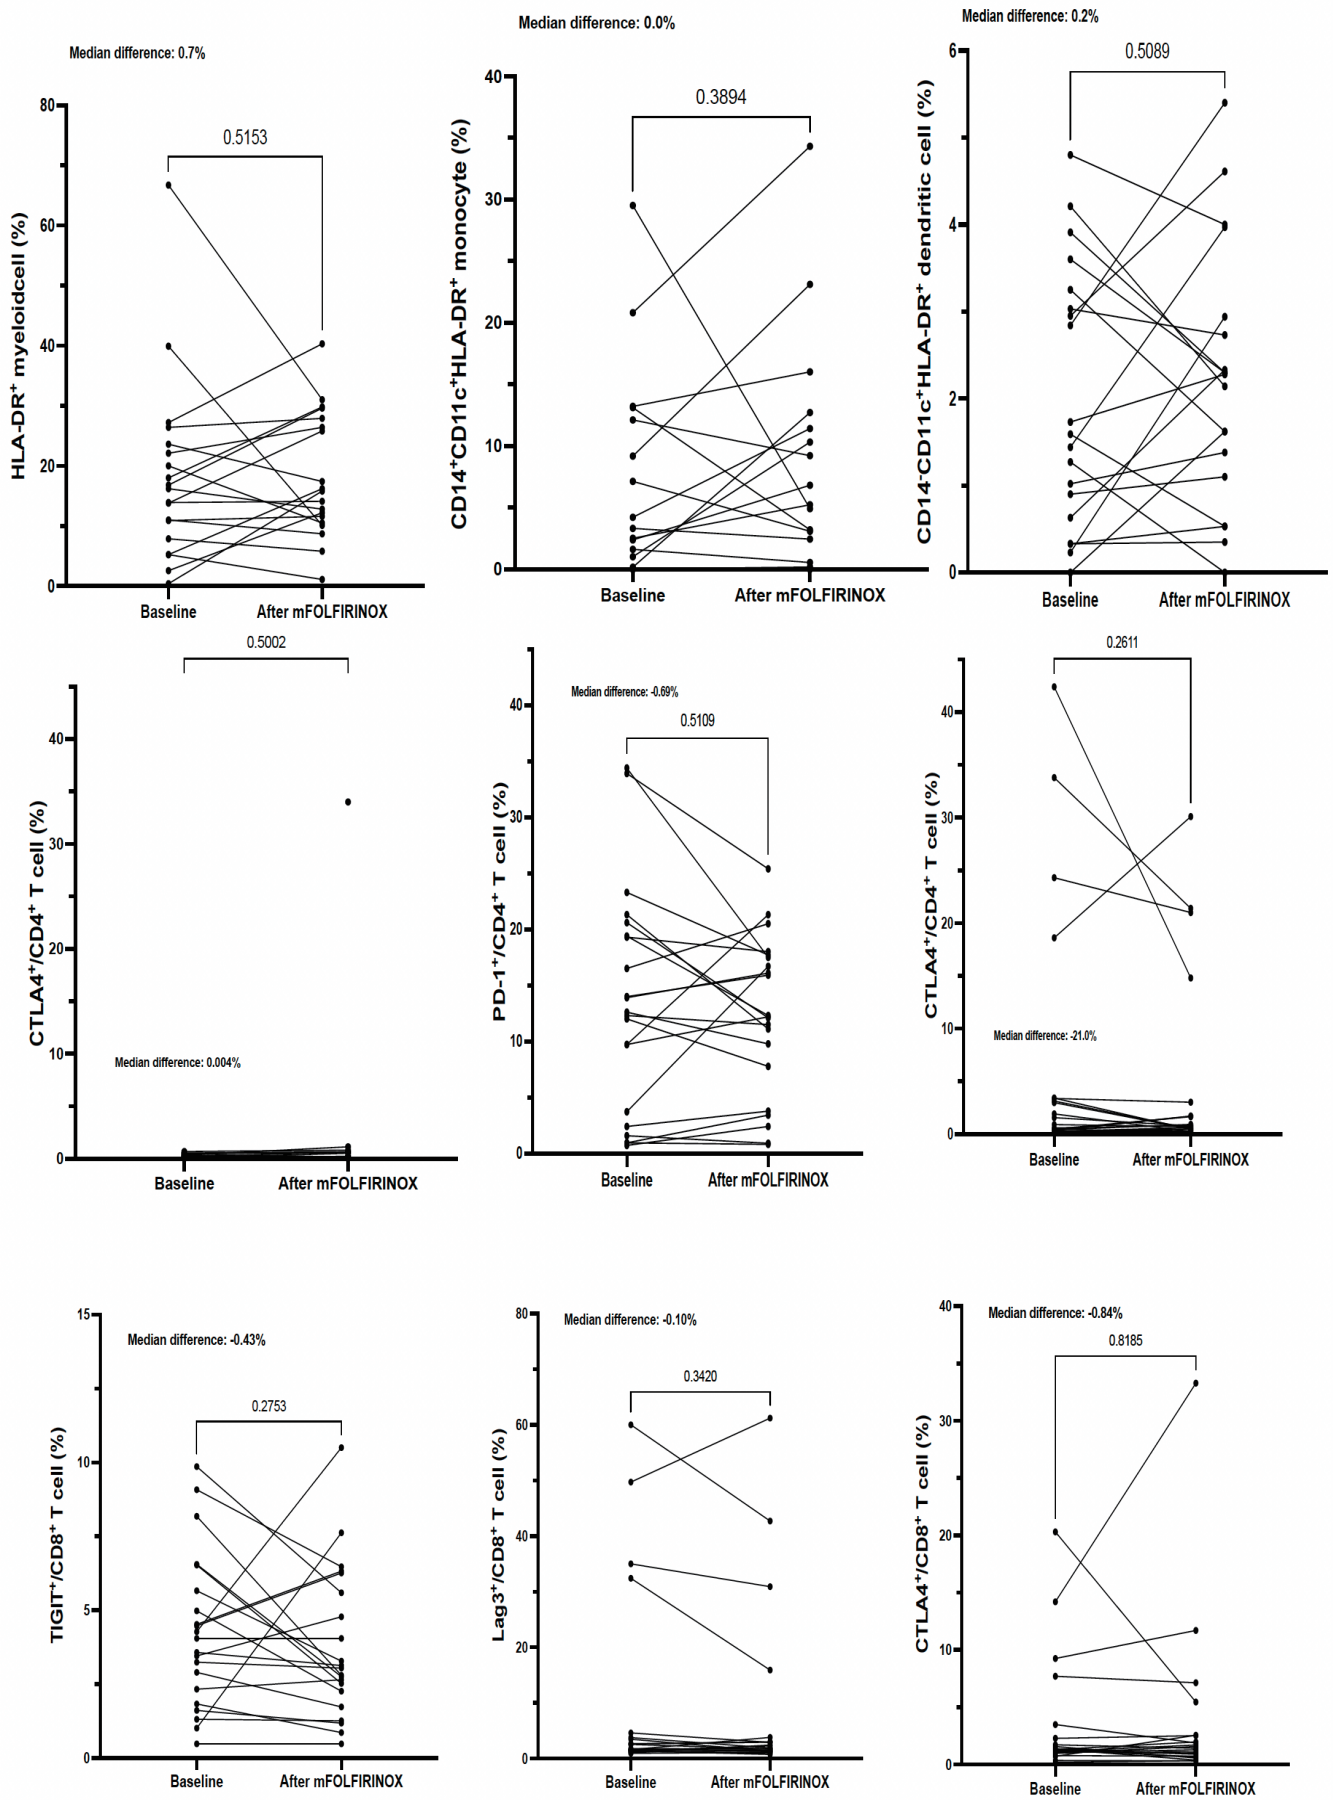



Supplementary figure 4.

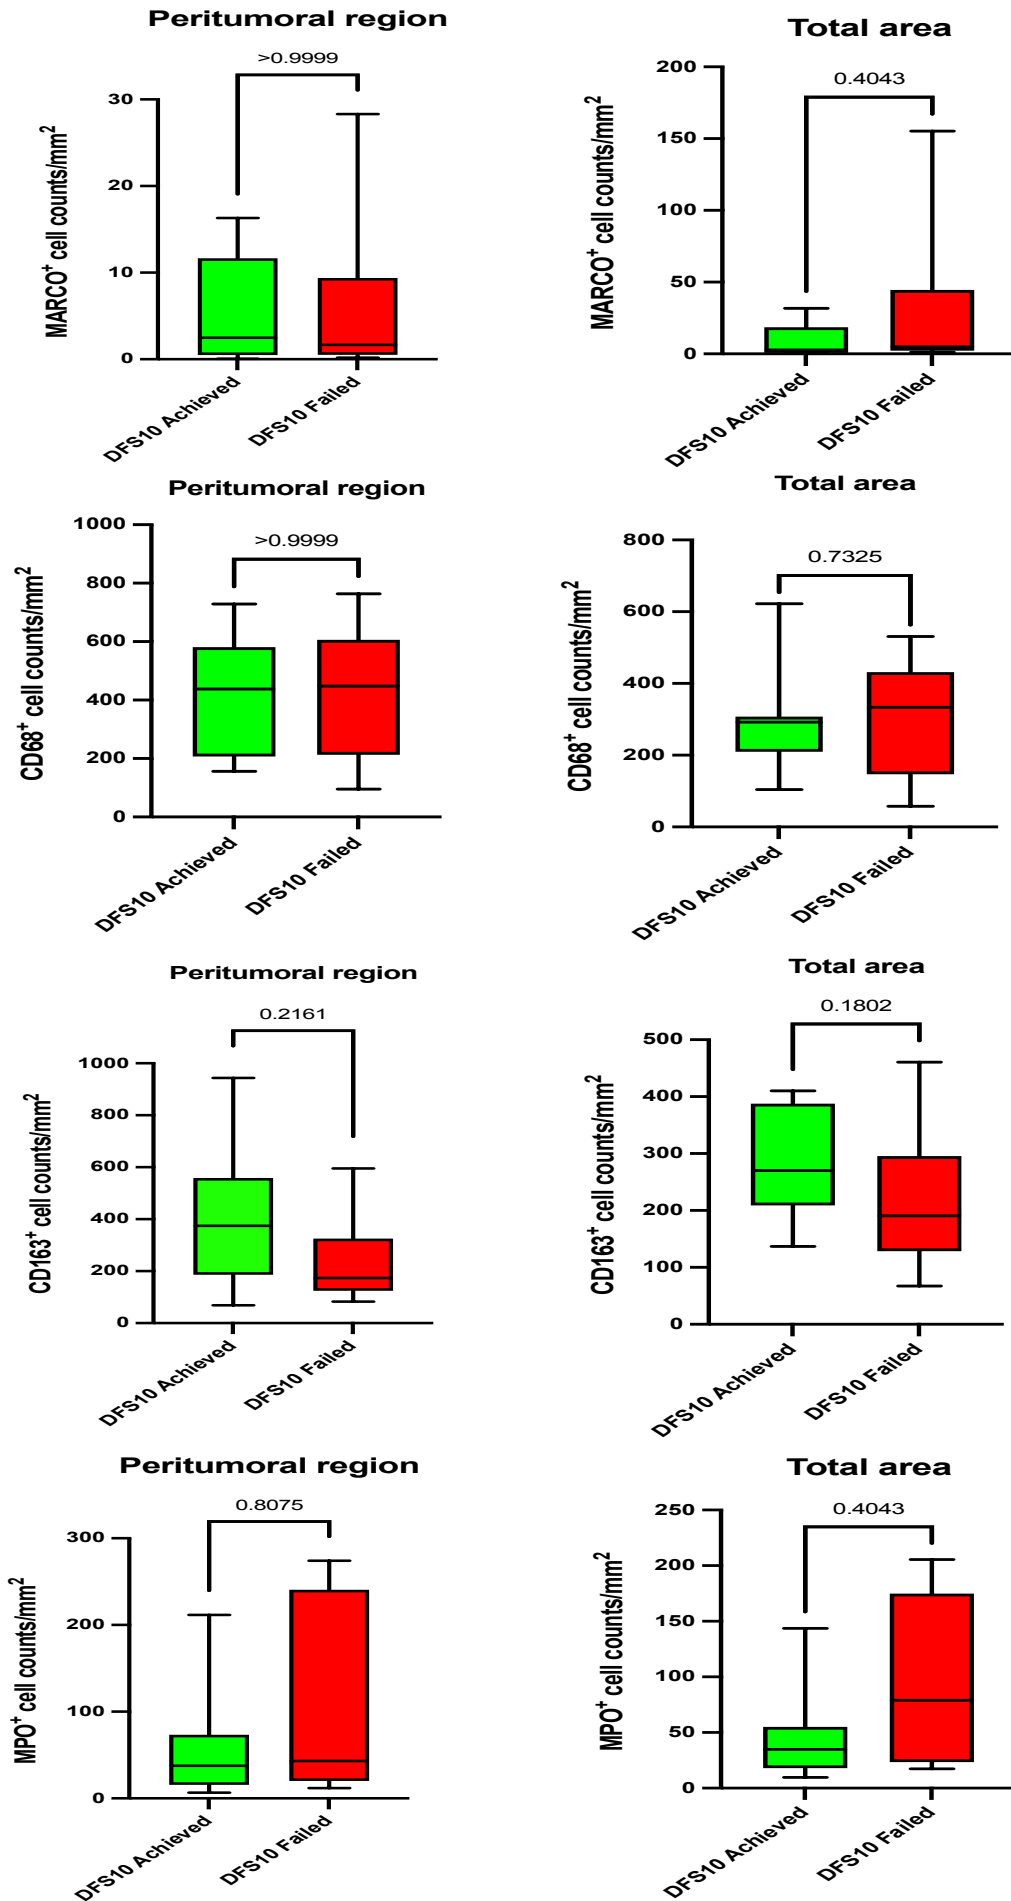

Supplementary figure 5.

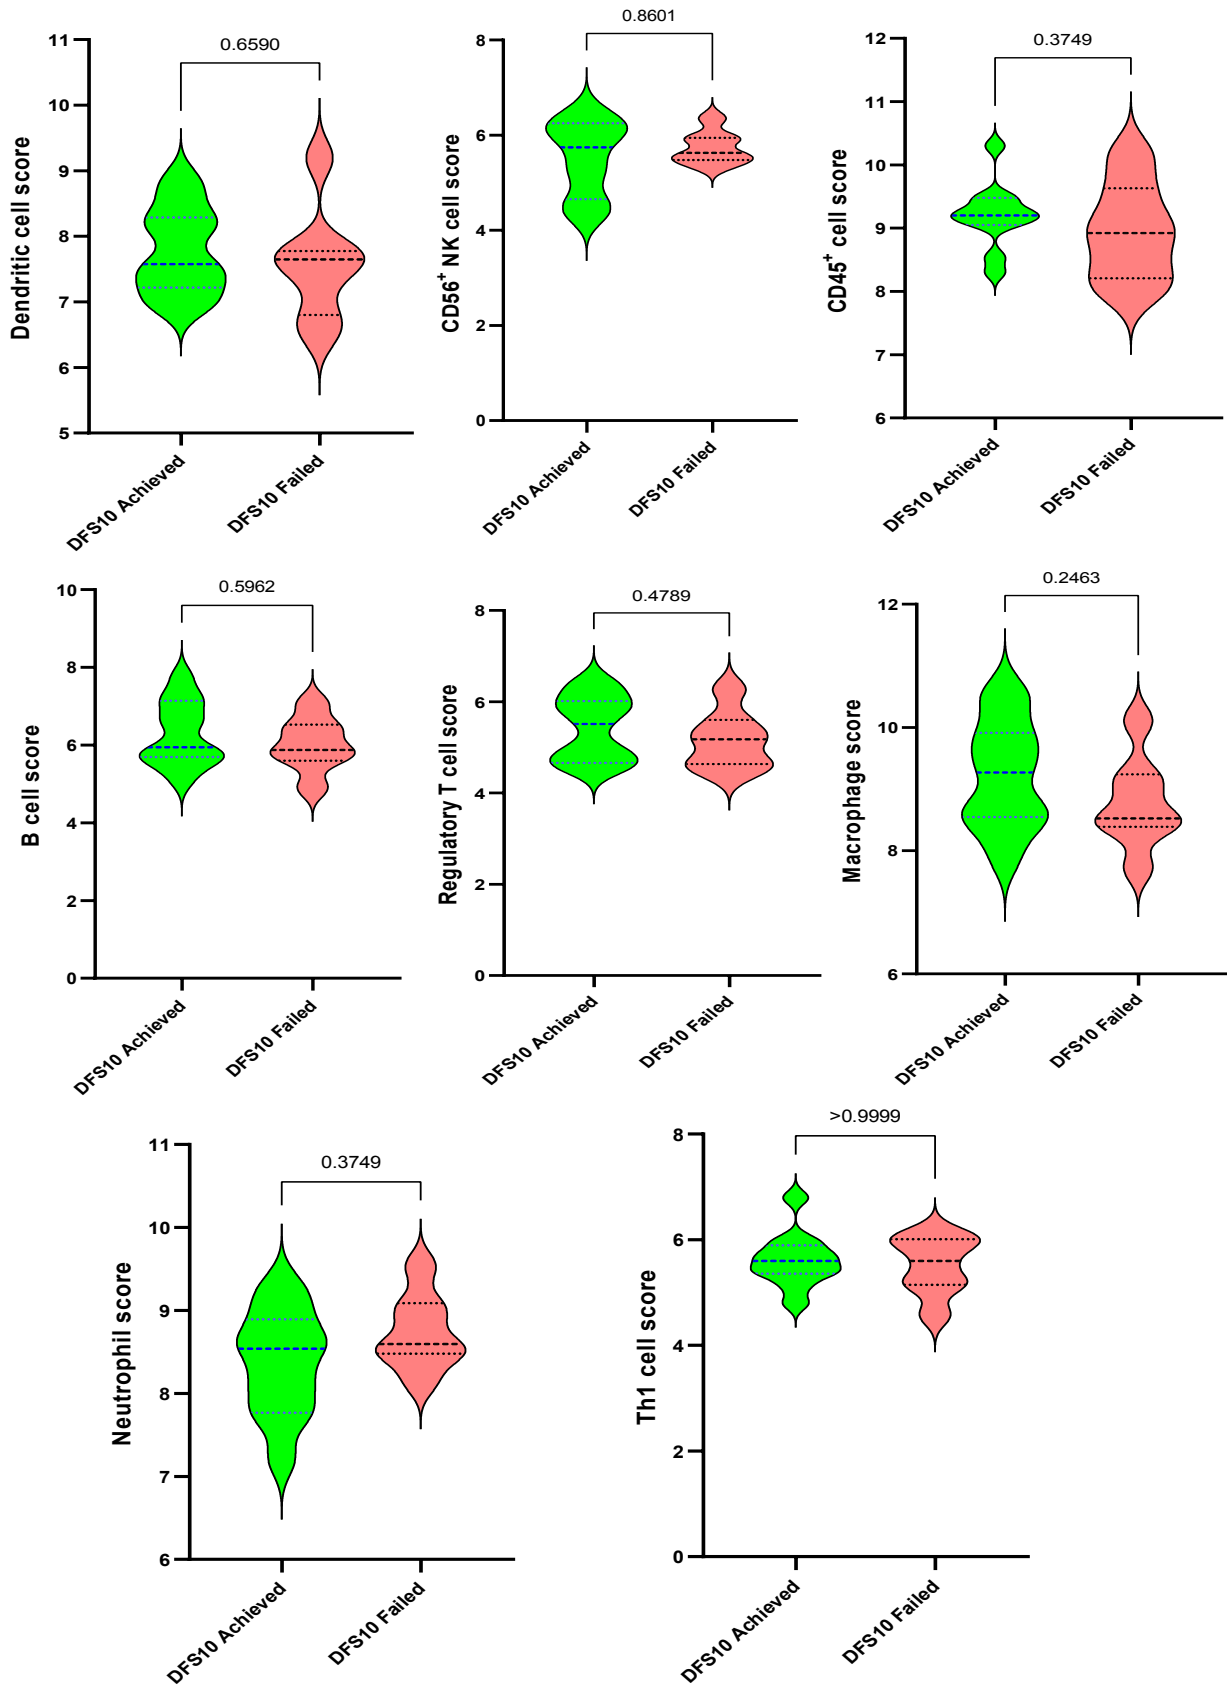

**Table S1. Baseline characteristics of patients treated with neoadjuvant mFOLFIRINOX**

|                                                          | <b>Total patients (N=44)</b> |
|----------------------------------------------------------|------------------------------|
| <b>Clinical variables</b>                                |                              |
| <b>Median age</b>                                        | 60 (range, 35-76)            |
| <b>Sex</b>                                               |                              |
| Male                                                     | 26 (59.1%)                   |
| Female                                                   | 18 (40.9%)                   |
| <b>Location of primary tumor</b>                         |                              |
| Head                                                     | 26 (59.1%)                   |
| Body or tail or multi-centric                            | 18 (40.9%)                   |
| <b>Baseline serum CA 19-9</b>                            |                              |
| Not elevated                                             | 11 (25.0%)                   |
| Elevated                                                 | 33 (75.0%)                   |
| <b>Median cycles of mFOLFIRINOX</b>                      | 8 (range, 2-10)              |
| <b>Response to mFOLFIRINOX</b>                           |                              |
| PR                                                       | 15 (34.1%)                   |
| SD                                                       | 28 (63.6%)                   |
| PD                                                       | 1 (2.3%)                     |
| <b>Surgical resection after preoperative mFOLFIRINOX</b> |                              |
| Yes                                                      | 27 (61.4%)                   |
| No                                                       | 17 (38.6%)                   |

**Table S2. Availability of biomarker samples of patients treated in the clinical trial (NCT02749136)**

| Study ID | Baseline sample   |                         | Post treatment sample |                         | Nanostring and IHC data |          |
|----------|-------------------|-------------------------|-----------------------|-------------------------|-------------------------|----------|
|          | Immune cell panel | T cell checkpoint panel | Immune cell panel     | T cell checkpoint panel | Availability            | DFS10    |
| AMC01    |                   |                         |                       |                         | Yes                     | Failed   |
| AMC02    |                   |                         |                       |                         |                         |          |
| AMC03    |                   |                         |                       |                         |                         |          |
| AMC04    |                   |                         |                       |                         |                         |          |
| AMC05    | Yes               | Yes                     | Yes                   | Yes                     | Yes                     | Achieved |
| AMC06    |                   |                         |                       |                         |                         |          |
| AMC07    | Yes               | Yes                     | Yes                   | Yes                     |                         |          |
| AMC08    |                   |                         |                       |                         |                         |          |
| AMC09    | Yes               | Yes                     | Yes                   | Yes                     | Yes                     | Failed   |
| AMC10    | Yes               | Yes                     | Yes                   | Yes                     | Yes                     | Failed   |
| AMC11    | Yes               | Yes                     | Yes                   | Yes                     | Yes                     | Failed   |
| AMC12    |                   |                         |                       |                         |                         |          |
| AMC13    |                   |                         |                       |                         |                         |          |
| AMC14    |                   |                         |                       |                         |                         |          |
| AMC15    | Yes               | Yes                     | Yes                   | Yes                     | Yes                     | Achieved |
| AMC16    | Yes               |                         |                       |                         | Yes                     | Achieved |
| AMC17    | Yes               |                         | Yes                   |                         | Yes                     | Achieved |
| AMC18    | Yes               |                         | Yes                   |                         | Yes                     | Achieved |
| AMC19    | Yes               | Yes                     | Yes                   | Yes                     |                         |          |
| AMC20    | Yes               | Yes                     |                       | Yes                     | Yes                     | Achieved |
| AMC21    | Yes               | Yes                     |                       | Yes                     |                         |          |
| AMC22    | Yes               | Yes                     | Yes                   | Yes                     | Yes                     | Achieved |
| AMC23    | Yes               | Yes                     |                       |                         |                         |          |
| AMC24    | Yes               | Yes                     |                       |                         | Yes                     | Achieved |
| AMC25    |                   |                         |                       |                         | Yes                     | Achieved |
| AMC26    | Yes               |                         |                       |                         | Yes                     | Failed   |
| AMC27    | Yes               |                         |                       |                         |                         |          |
| AMC28    |                   |                         |                       |                         |                         |          |
| AMC29    |                   |                         |                       |                         |                         |          |
| AMC30    | Yes               |                         |                       |                         |                         |          |
| AMC32    | Yes               | Yes                     |                       | Yes                     |                         |          |
| AMC33    | Yes               | Yes                     |                       |                         | Yes                     | Failed   |
| AMC34    | Yes               | Yes                     | Yes                   | Yes                     |                         |          |
| AMC35    | Yes               | Yes                     |                       |                         |                         |          |
| AMC36    |                   |                         |                       |                         | Yes                     | Failed   |
| AMC37    | Yes               | Yes                     | Yes                   | Yes                     | Yes                     | Achieved |
| AMC38    | Yes               | Yes                     | Yes                   | Yes                     |                         |          |
| AMC39    | Yes               | Yes                     |                       |                         | Yes                     | Achieved |
| AMC40    | Yes               | Yes                     | Yes                   | Yes                     |                         |          |
| AMC41    | Yes               | Yes                     | Yes                   | Yes                     |                         |          |
| AMC42    | Yes               | Yes                     | Yes                   | Yes                     |                         |          |
| AMC43    | Yes               | Yes                     | Yes                   | Yes                     |                         |          |
| AMC44    | Yes               | Yes                     | Yes                   | Yes                     |                         |          |
| AMC45    | Yes               | Yes                     | Yes                   | Yes                     |                         |          |

**Table S3. Univariate analysis of survival outcomes according to baseline peripheral immune cell level (Cox proportional hazards model, continuous variable)**

| Baseline peripheral level (%) | Overall survival       |          | Progression-free survival |          |
|-------------------------------|------------------------|----------|---------------------------|----------|
|                               | Hazards ratio (95% CI) | <i>P</i> | Hazards ratio (95% CI)    | <i>P</i> |
| CD3+ T cell                   | 0.99 (0.96-1.01)       | 0.322    | 0.99 (0.97-1.01)          | 0.559    |
| CD4+ T cell                   | 0.98 (0.94-1.02)       | 0.27     | 0.99 (0.96-1.02)          | 0.378    |
| CD69+CD4+ T cell              | 0.97 (0.87-1.07)       | 0.524    | 0.99 (0.94-1.05)          | 0.112    |
| Foxp3+CD4+ T cell             | 0.78 (0.59-1.03)       | 0.077    | 0.84 (0.72-0.97)          | 0.02*    |
| CD8+                          | 0.96 (0.88-1.05)       | 0.393    | 0.99 (0.96-1.02)          | 0.776    |
| CD69+CD8+                     | 0.93 (0.82-1.06)       | 0.3      | 0.94 (0.86-1.02)          | 0.143    |
| CD56+ NK                      | 1.07 (0.98-1.17)       | 0.126    | 1.03 (0.97-1.11)          | 0.32     |
| CD69+CD56+                    | 0.97 (0.92-1.01)       | 0.16     | 0.97 (0.95-1.10)          | 0.066    |
| Gamma delta T cell            | 1.10 (0.94-1.29)       | 0.245    | 1.04 (0.91-1.20)          | 0.546    |
| CD69+Gamma delta T cell       | 0.94 (0.86-1.03)       | 0.183    | 0.96 (0.93-1.00)          | 0.067    |
| HLA-DR+ Myeloid cell          | 1.00 (0.96-1.04)       | 0.944    | 0.99 (0.96-1.02)          | 0.445    |
| CD11c+CD14- Dendritic cell    | 0.95 (0.82-1.11)       | 0.544    | 0.96 (0.87-1.06)          | 0.448    |
| CD14+CD11c+ Monocyte          | 1.07 (1.01-1.13)       | 0.026*   | 1.06 (1.00-1.12)          | 0.044*   |
| CTLA4+CD4+                    | 0.83 (0.57-1.21)       | 0.33     | 0.94 (0.86-1.02)          | 0.155    |
| Lag-3+CD4+                    | 0.87 (0.19-4.10)       | 0.865    | 0.98 (0.95-1.01)          | 0.134    |
| PD-1+CD4+                     | 0.98 (0.92-1.05)       | 0.594    | 0.99 (0.94-1.05)          | 0.699    |
| TIGIT+CD4+                    | 0.96 (0.84-1.10)       | 0.577    | 0.99 (0.89-1.09)          | 0.783    |
| CTLA4+CD8+                    | 0.73 (0.40-1.31)       | 0.288    | 0.89 (0.76-1.05)          | 0.163    |
| Lag-3+CD8+                    | 0.93 (0.83-1.05)       | 0.268    | 0.97 (0.94-1.01)          | 0.173    |
| PD-1+CD8+                     | 1.03 (0.96-1.09)       | 0.421    | 1.01 (0.96-1.06)          | 0.693    |
| TIGIT+CD8+                    | 1.10 (0.87-1.40)       | 0.427    | 1.05 (0.88-1.27)          | 0.574    |

(CI; confidence interval, \*; *P*<0.05)

**Table S4. Non-parametric bootstrapping of paired comparison of immune cell level pre- and post-chemotherapy.**

| T cell                                     | Original estimates    |          | Bootstrapping estimates (Sampling=1,000)                  |                |          |
|--------------------------------------------|-----------------------|----------|-----------------------------------------------------------|----------------|----------|
|                                            | Median difference (%) | <i>P</i> | Mean of bootstrapped median difference estimates (95% CI) | Standard error | <i>P</i> |
| TIGIT <sup>+</sup> CD4 <sup>+</sup> T cell | -0.84                 | 0.0701   | -0.500 (- 1.494, -0.851)                                  | 0.573          | 0.349    |
| PD-1 <sup>+</sup> CD8 <sup>+</sup> T cell  | -3.22                 | 0.0136   | -3.273 (-6.132, -0.144)                                   | 1.537          | 0.047    |

**Table S5. Comparison of clinical variables between the two recurrence groups**

|                                               | DFS10           |                | P      |
|-----------------------------------------------|-----------------|----------------|--------|
|                                               | Achieved (N=11) | Failed (N=7)   |        |
| <b>Resection</b>                              |                 |                | 0.2451 |
| R0                                            | 10 (90.9%)      | 4 (57.1%)      |        |
| R1                                            | 1 (9.1%)        | 3 (42.9%)      |        |
| <b>Surgery</b>                                |                 |                | 0.326  |
| Pancreatico-duodenectomy                      | 9 (81.8%)       | 4 (57.1%)      |        |
| Distal pancreatectomy or total pancreatectomy | 2 (18.2%)       | 3 (42.9%)      |        |
| <b>Major vessel resection</b>                 |                 |                | 0.3348 |
| Yes                                           | 4 (36.4%)       | 5 (71.4%)      |        |
| No                                            | 7 (63.6%)       | 2 (28.6%)      |        |
| <b>Histology</b>                              |                 |                | 0.6405 |
| W/D, M/D                                      | 10 (90.9%)      | 6 (85.7%)      |        |
| Others                                        | 1 (9.1%)        | 0              |        |
| P/D                                           | 0               | 1 (14.3%)      |        |
| <b>Pathologic stage</b>                       |                 |                | 0.8029 |
| IA-IB                                         | 2 (18.2%)       | 0              |        |
| IIA                                           | 5 (45.5%)       | 3 (42.9%)      |        |
| IIB                                           | 4 (36.3%)       | 4 (57.1%)      |        |
| <b>CAP tumor regression grade</b>             |                 |                | 0.4608 |
| 1                                             | 2 (18.2%)       | 0              |        |
| 2                                             | 8 (72.7%)       | 5 (71.4%)      |        |
| 3                                             | 1 (9.1%)        | 2 (28.6%)      |        |
| <b>Adjuvant gemcitabine</b>                   |                 |                | 0.3889 |
| Yes                                           | 11 (100%)       | 6 (85.7%)      |        |
| No                                            | 0               | 1 (28.6%)      |        |
| <b>Median gemcitabine cycle</b>               | 6 (range, 3-6)  | 3 (range, 1-6) |        |

W/D, well-differentiated; M/D, moderately differentiated, P/D, poorly differentiated;  
 CAP, College of American Pathologists.

**Table S6. Gene list of significant differential expression between the recurrence groups.**

| Gene    | Fold Change | Log2 Fold Change | <i>P</i> | Adjusted <i>P</i> |
|---------|-------------|------------------|----------|-------------------|
| LTF     | 6.53121     | 2.70735          | 0.001565 | 0.078862          |
| LILRB5  | 2.10472     | 1.07363          | 0.000778 | 0.06988           |
| FN1     | -2.21427    | -1.14683         | 0.004943 | 0.131122          |
| SPP1    | -2.37522    | -1.24806         | 0.006475 | 0.135977          |
| DUSP4   | -2.48821    | -1.31511         | 0.000916 | 0.06988           |
| CEACAM6 | -3.4277     | -1.77724         | 0.004453 | 0.12933           |
| SLC2A1  | -5.11296    | -2.35416         | 0.000101 | 0.048545          |
| MARCO   | -5.40041    | -2.43307         | 0.000193 | 0.048545          |



**Table S7. Directed enrichment score of gene sets from nanostring data**

| Gene set                          | Directed Enrichment Score |
|-----------------------------------|---------------------------|
| Th1 Differentiation               | 1.0996                    |
| Type II Interferon Signaling      | 0.6631                    |
| Th2 Differentiation               | 0.621                     |
| Type I Interferon Signaling       | 0.3501                    |
| Adaptive Immune System            | 0.2985                    |
| Oxidative Stress                  | -0.3005                   |
| Transcriptional Regulation        | -0.3245                   |
| Chemokine Signaling               | -0.3477                   |
| Inflammasomes                     | -0.3856                   |
| TNF Family Signaling              | -0.4696                   |
| Cell Adhesion                     | -0.5037                   |
| MHC Class II Antigen Presentation | -0.5203                   |
| Complement System                 | -0.6036                   |
| Th17 Differentiation              | -0.6241                   |
| Cytokine Signaling                | -0.6252                   |
| Lymphocyte Activation             | -0.6423                   |
| Hemostasis                        | -0.7545                   |
| Autophagy                         | -0.755                    |
| Lymphocyte Trafficking            | -0.7895                   |
| Host-pathogen Interaction         | -0.7897                   |
| MHC Class I Antigen Presentation  | -0.8254                   |
| B cell Receptor Signaling         | -0.8469                   |
| Phagocytosis and Degradation      | -0.8566                   |
| T Cell Receptor Signaling         | -0.8977                   |
| Treg Differentiation              | -0.9506                   |
| Innate Immune System              | -0.9625                   |
| NLR signaling                     | -0.9939                   |
| TLR Signaling                     | -1.0526                   |
| NF-kB Signaling                   | -1.1232                   |
| Apoptosis                         | -1.1364                   |
| TGF- $\beta$ Signaling            | -1.2129                   |
| Immunometabolism                  | -1.4371                   |

**Table S8. Clinical characteristics of pancreatic cancer patients from TCGA data (the Human Protein Atlas).**

| <b>Variables</b> | <b>N=176</b>            |
|------------------|-------------------------|
| Age (Median)     | 65 years (range, 35-88) |
| Sex              |                         |
| Male             | 96                      |
| Female           | 80                      |
| Race             | <b>N=172</b>            |
| Asian            | 11                      |
| African          | 6                       |
| White            | 155                     |
| TNM Stage        | <b>N=173</b>            |
| Stage I          | 21                      |
| Stage II         | 145                     |
| Stage III        | 3                       |
| Stage IV         | 4                       |
| Median FPKM      | 5.36                    |
